# Supplementary material for: Association and Predictive Value of C-Reactive Protein, Fibrinogen and Periodontal Indices in Periodontitis Severity : A Retrospective study
Source: Research Square preprint supplement (doi:10.21203/rs.3.rs-8122125/v1), 2025-12-02
Supplement: Supplementary file 1 [file e0ac145de7c67ddfb8ce7aa0.docx]

| **Table S1. Overall Clinical Features of Periodontitis** | |
| --- | --- |
| Features | Overall |
| Sample Size (n) | 215 |
| Gender (%) |  |
| Male | 113 (52.6) |
| Female | 102 (47.4) |
| Age, mean (SD) | 42.54 (12.13) |
| Hypertension (%) |  |
| Yes | 17 (7.9) |
| No | 198 (92.1) |
| Diabetes (%) |  |
| Yes | 10 (4.7) |
| No | 205 (95.3) |
| PLI (%) |  |
| 1 | 65 (30.2) |
| 2 | 138 (64.2) |
| 3 | 12 (5.6) |
| GI (%) |  |
| 1 | 30 (14.0) |
| 2 | 153 (71.2) |
| 3 | 32 (14.9) |
| BI (%) |  |
| 2 | 3 (1.4) |
| 3 | 33 (15.3) |
| 4 | 176 (81.9) |
| 5 | 3 (1.4) |
| PD, mean (SD) | 6.28 (1.95) |
| AL, mean (SD) | 7.41 (2.26) |
| CRP, mean (SD) | 1.86 (0.82) |
| Fg, mean (SD) | 2.52 (0.47) |
| Stage (%) |  |
| I | 5 (2.3) |
| II | 20 (9.3) |
| III | 136 (63.3) |
| IV | 54 (25.1) |
| Grade (%) |  |
| B | 91 (42.3) |
| C | 124 (57.7) |
